# Supplementary material
Source: PubMed Central journal article supplement (PMC9444980)
Supplement: NIHMS1829609-supplement-1.pdf [file NIHMS1829609-supplement-1.pdf]

## Changes in BMI during the COVID-19 Pandemic Period

### Supplemental Materials

#### Sensitivity Analyses

- 1) Because our study inclusion criteria required completing an in-person or virtual cohort study visit during the pandemic period, we explored whether children who returned for a study visit had different sociodemographic attributes than those who were not seen during the COVID-19 pandemic. It is possible that children who were able to complete a study visit during the pandemic were less adversely affected and thus less likely to gain weight than children who were not seen during that time. We evaluated this possibility in two different ways. First, we created an expanded “Comparison Sample” of 10,349 children from 51 cohorts that contributed at least one BMI measure before the pandemic (October 2017 through February 2020), and compared core sociodemographic characteristics between this group and the primary analytic sample (Supplement Table 1).
- 2) Second, we conducted a sensitivity analysis comparing BMI change across two pre-pandemic periods, to explore whether changes in BMI in the pandemic period might be attributable secular increases in BMI associated with the US obesity epidemic rather than pandemic-related factors. We defined the “sensitivity baseline” period as the 20-month period from October 2017 through May 2019, and the “sensitivity comparison” period from June 2019 through February 2020. We repeated the same analytic models as the main analysis, comparing the “sensitivity baseline” to the “sensitivity comparison” periods and found no statistically significant increase in BMI in the sensitivity comparison period (Supplement Table 2).
- 3) Last, to explore the effect of the method of ascertainment of height and weight on the results given that study-measured heights and weights are more accurate than those done during clinical

visits or self-reported measures, we also repeated the main analysis among only those children who had study-measured heights and weights in both the pre-pandemic and during-pandemic period (Supplement Table 2).

Prepublication Release

**Supplement Table 1: Characteristics of the Primary Analytic Sample Compared to Pre-Pandemic Trends, Study Measure Sample, and Comparison Sample**

|                                       | <b>Primary Analytic Sample<sup>1</sup></b> | <b>Pre-Pandemic Trends Sample<sup>2</sup></b> | <b>Study Measure Sample<sup>3</sup></b> | <b>Comparison Sample<sup>4</sup></b> |
|---------------------------------------|--------------------------------------------|-----------------------------------------------|-----------------------------------------|--------------------------------------|
|                                       | (n = 1996)                                 | (n = 1516)                                    | (n = 1052)                              | (n = 10349)                          |
| Child age in 2018                     | 5.9 ± 3.4                                  | 5.2 ± 2.8                                     | 5.4 ± 2.5                               | 5.9 ± 3.7                            |
| Gender, Female                        | 975 (49%)                                  | 745 (49%)                                     | 516 (49%)                               | 4939 (48%)                           |
| <b>Race &amp; Ethnicity</b>           |                                            |                                               |                                         |                                      |
| Missing                               | 8 (0.4%)                                   | 8 (0.5%)                                      | 5 (0.5%)                                | 179 (1.7%)                           |
| Non-Hispanic white, n(%)              | 1067 (53%)                                 | 653 (43%)                                     | 557 (53%)                               | 5095 (49%)                           |
| Non-Hispanic black, n(%)              | 299 (15%)                                  | 260 (17%)                                     | 193 (18%)                               | 1485 (14%)                           |
| Non-Hispanic other, n(%)              | 294 (15%)                                  | 233 (15%)                                     | 140 (13%)                               | 1379 (13%)                           |
| Hispanic, all races, n(%)             | 328 (16%)                                  | 362 (24%)                                     | 157 (15%)                               | 2211 (21%)                           |
| <b>Maternal Education</b>             |                                            |                                               |                                         |                                      |
| Missing                               | 42 (2.1%)                                  | 46 (3.0%)                                     | 20 (1.9%)                               | 360 (3.5%)                           |
| Less than High School                 | 70 (3.5%)                                  | 90 (5.9%)                                     | 53 (5.0%)                               | 461 (4.5%)                           |
| High school degree, GED or equivalent | 178 (8.9%)                                 | 202 (13%)                                     | 128 (12%)                               | 1176 (11%)                           |
| Some college and above <sup>1</sup>   | 1706 (85%)                                 | 1178 (78%)                                    | 851 (81%)                               | 8352 (81%)                           |
| <b>Income</b>                         |                                            |                                               |                                         |                                      |
| Missing                               | 294 (15%)                                  | 242 (16%)                                     | 137 (13%)                               | 2878 (28%)                           |
| <= \$ 30,000                          | 248 (12%)                                  | 267 (18%)                                     | 178 (17%)                               | 1520 (15%)                           |
| \$30,000 - \$49,999                   | 228 (11%)                                  | 194 (13%)                                     | 138 (13%)                               | 936 (9.0%)                           |
| \$50,000 - \$74,999                   | 255 (13%)                                  | 212 (14%)                                     | 141 (13%)                               | 1073 (10%)                           |
| \$75,000 or more                      | 971 (49%)                                  | 601 (40%)                                     | 458 (44%)                               | 3942 (38%)                           |
| <b>BMI Category</b>                   |                                            |                                               |                                         |                                      |
| Underweight(<5 pct)                   | 120 (6%)                                   | 91 (6.0%)                                     | 63 (6.0%)                               | 557 (5.4%)                           |
| Healthy weight(5-85 pct)              | 1400 (70%)                                 | 1050 (69%)                                    | 736 (70%)                               | 7161 (69%)                           |
| Overweight(85-95 pct)                 | 244 (12%)                                  | 182 (12%)                                     | 123 (12%)                               | 1329 (13%)                           |
| Obese(>=95 pct)                       | 232 (12%)                                  | 193 (13%)                                     | 130 (12%)                               | 1302 (13%)                           |
| BMI, mean (SD), Pre-Pandemic          | 17.051 ± 3.307                             | 16.926 ± 2.995                                | 16.700 ± 2.994                          | 17.264 ± 3.586                       |
| BMI, mean (SD), During Pandemic       | 18.296 ± 4.676                             | N/A                                           | 18.169 ± 4.608                          | 18.297 ± 4.672                       |

©2022 American Academy of Pediatrics

## Prepublication Release

|                                          |               |            |               |               |
|------------------------------------------|---------------|------------|---------------|---------------|
| Change in BMI, Pre/During Pandemic       | 1.143 ± 2.790 | N/A        | 1.465 ± 2.916 | 1.139 ± 2.788 |
| BMI Ascertainment Method Pre-Pandemic    |               |            |               |               |
| Self-report                              | 80 (2.6%)     | <35        | N/A           | 584 (4.2%)    |
| Parent-report                            | 113 (3.7%)    | <5         | N/A           | 232 (1.7%)    |
| Medical record                           | 423 (14%)     | 231 (15%)  | N/A           | 2221 (16%)    |
| Study Measure                            | 2431 (80%)    | 1249 (82%) | 1575 (100%)   | 10997 (78%)   |
| BMI Ascertainment Method During-Pandemic |               |            |               |               |
| Self-report                              | 591 (28%)     | N/A        | N/A           | 593 (28%)     |
| Parent-report                            | 433 (20%)     | N/A        | N/A           | 434 (20%)     |
| Medical record                           | 27 (1.3%)     | N/A        | N/A           | 27 (1.3%)     |
| Study Measure                            | 1092 (51%)    | N/A        | 1089 (100%)   | 1095 (51%)    |

<sup>1</sup> Children are included in the primary analytic sample if they had at least one BMI in both the pre-pandemic period (October 2017 through February 2020) and the pandemic-period (March 2020 through May 2021), which includes 1996 children with 5190 BMI measures.

<sup>2</sup> Children are included in the pre-pandemic trends sample if they had with at least one BMI measure in both the first and second half of the Pre-Pandemic periods (Pre-pandemic 1: October 2017 to May 2019, Pre-Pandemic 2: June 2019 to February 2020), which includes 1516 children with 3733 BMI measures.

<sup>3</sup> Children are included in the study measures sample if they were included in the primary analytic sample and BMI measures were study measured in both pre and post pandemic periods, which includes 1052 children with 2664 BMI measures.

<sup>4</sup> The comparison sample includes of 10,349 children from 51 cohorts that contributed at least one BMI measure before the pandemic (October 2017 through February 2020).

Supplement Table 2: Longitudinal Associations with Change in BMI from October 2017 – May 2021

|                                         | Primary Analytic Sample<br>(n = 1996) | Pre-Pandemic Trends Sample<br>(n = 1516) | Study Measure Sample<br>(n = 1052) |
|-----------------------------------------|---------------------------------------|------------------------------------------|------------------------------------|
| <b>Year</b>                             | -0.04 (-0.15, 0.07)                   | 0.07 (-0.26, 0.4)                        | -0.16 (-0.32, 0.01)                |
| <b>Year x COVID Year</b>                | 0.24 (0.02, 0.45)                     | -                                        | 0.42 (0.1, 0.74)                   |
| <b>Year x Pre 1st/2nd</b>               | -                                     | -0.1 (-0.34, 0.14)                       | -                                  |
| <b>Constant</b>                         | 14.13 (13.42, 14.84)                  | 13.61 (12.62, 14.6)                      | 14.44 (13.59, 15.3)                |
| <b>Age</b>                              | 0.46 (0.4, 0.51)                      | 0.37 (0.31, 0.42)                        | 0.39 (0.32, 0.46)                  |
| <b>Gender, Male</b>                     | 0.01 (-0.17, 0.19)                    | -0.13 (-0.31, 0.04)                      | 0.1 (-0.14, 0.33)                  |
| <b>Race/Ethnicity</b>                   |                                       |                                          |                                    |
| <b>NH White</b>                         | REF                                   | REF                                      | REF                                |
| <b>NH black</b>                         | 0.55 (0.23, 0.88)                     | 0.29 (-0.03, 0.61)                       | 0.72 (0.32, 1.12)                  |
| <b>NH other</b>                         | 0.15 (-0.13, 0.43)                    | 0.03 (-0.25, 0.3)                        | 0.1 (-0.27, 0.48)                  |
| <b>Hispanic</b>                         | 0.13 (-0.16, 0.41)                    | 0.06 (-0.2, 0.31)                        | 0.34 (-0.04, 0.73)                 |
| <b>Income</b>                           |                                       |                                          |                                    |
| <b>&lt;= 30,000</b>                     | REF                                   | REF                                      | REF                                |
| <b>30k-50k</b>                          | -0.26 (-0.65, 0.13)                   | -0.14 (-0.46, 0.18)                      | -0.04 (-0.47, 0.39)                |
| <b>50k-75k</b>                          | -0.29 (-0.69, 0.11)                   | 0.08 (-0.26, 0.42)                       | 0.1 (-0.36, 0.57)                  |
| <b>\$75k or more</b>                    | -0.68 (-1.04, -0.32)                  | -0.34 (-0.63, -0.05)                     | -0.29 (-0.71, 0.13)                |
| <b>Education</b>                        |                                       |                                          |                                    |
| <b>Less than HS</b>                     | REF                                   | REF                                      | REF                                |
| <b>High school degree</b>               | -0.74 (-1.33, -0.15)                  | 0.05 (-0.39, 0.49)                       | -0.93 (-1.57, -0.29)               |
| <b>Some college</b>                     | -0.69 (-1.22, -0.17)                  | 0.14 (-0.26, 0.55)                       | -0.77 (-1.37, -0.18)               |
| <b>COVID Year</b>                       | -0.61 (-1.54, 0.33)                   | -                                        | -0.97 (-2.31, 0.36)                |
| <b>Pre-Pandemic 1 vs pre-pandemic 2</b> | -                                     | 0.35 (-0.36, 1.06)                       | -                                  |
| <b>BMI Measurement Type</b>             |                                       |                                          |                                    |
| <b>Study Measure</b>                    | REF                                   | REF                                      | -                                  |
| <b>SR</b>                               | -0.24 (-0.49, 0)                      | 0.19 (-0.48, 0.86)                       | -                                  |
| <b>PR</b>                               | -0.28 (-0.57, 0.02)                   | -0.09 (-0.51, 0.34)                      | -                                  |
| <b>MR</b>                               | 1.26 (0.88, 1.64)                     | 0.91 (0.59, 1.23)                        | -                                  |
| <b>BMI Baseline Cat</b>                 |                                       |                                          |                                    |
| <b>Under/Healthy</b>                    | REF                                   | REF                                      | REF                                |
| <b>Overweight</b>                       | 2.87 (2.59, 3.16)                     | 2.56 (2.28, 2.84)                        | 2.9 (2.53, 3.28)                   |
| <b>Obese</b>                            | 6.93 (6.64, 7.23)                     | 6.14 (5.86, 6.42)                        | 6.47 (6.09, 6.84)                  |
| <b>N Obs</b>                            | 5190                                  | 3733                                     | 2664                               |
